# Supplementary material
Source: HighWire-hosted journal article supplement (http://thorax.bmj.com/highwire/filestream/174023/field_highwire_adjunct_files/1/63135webonlyapp2.pdf)

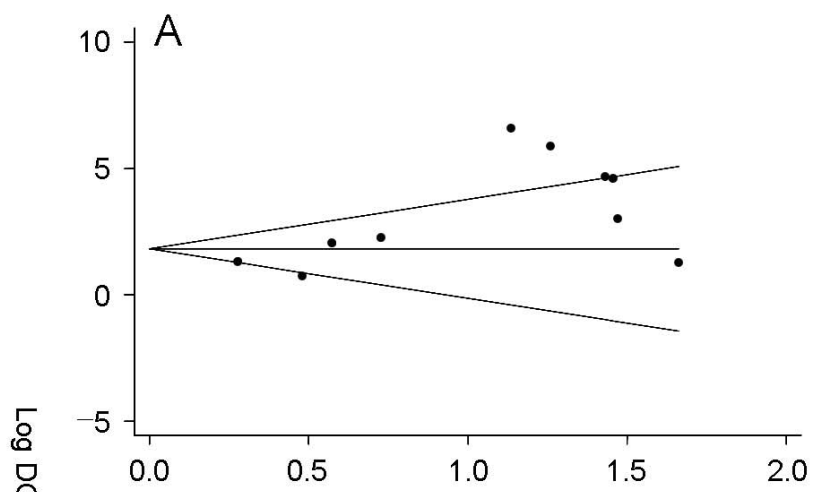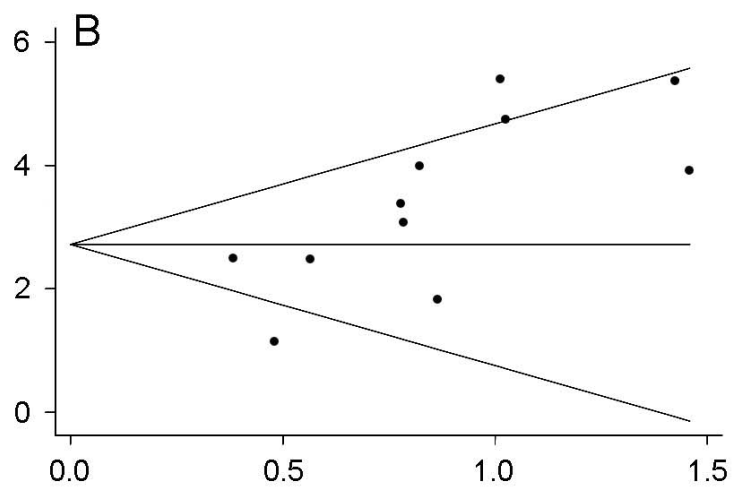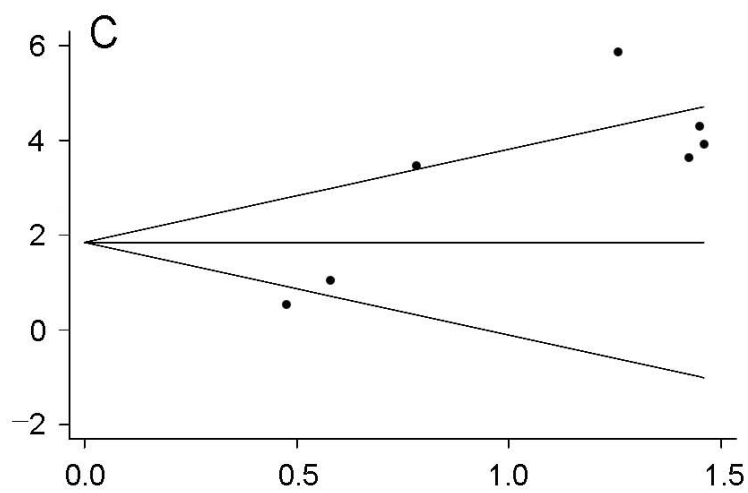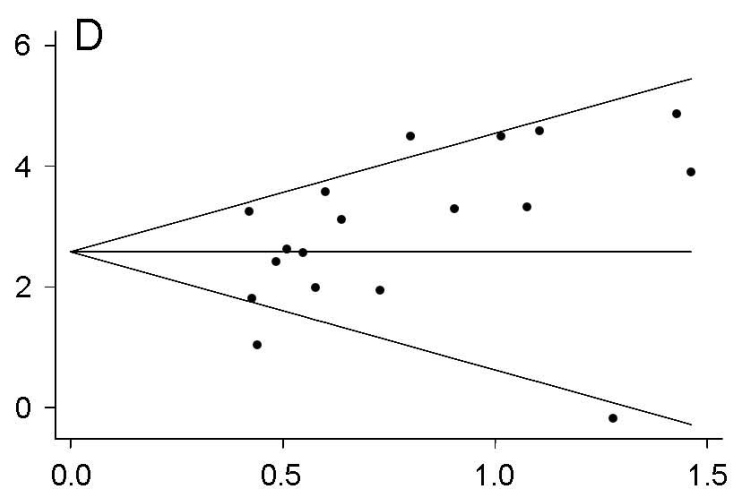

Standard error of log DOR

Supplement: 63135webonlyapp2.pdf [file 63135webonlyapp2.pdf]
